# Supplementary material for: Lichen and Lichenicolous Fungal Communities Tested as Suitable Systems for the Application of Cross-Taxon Analysis
Source: MDPI journal article supplement (doi:10.3390/d15020285), 2023-02-16
Supplement: s1 [file s1]

## Supplementary Material

**Table S1.** Species of lichenicolous fungi , their lichen hosts, and numbers identifying plots and subplots in which the samples were collected. The table is taken from Fleischhaker et al. (2015) [24].

| Lichenicolous fungal species       | Host lichen species                                 | Plot IDs (subplot IDs)                                                           |
|------------------------------------|-----------------------------------------------------|----------------------------------------------------------------------------------|
| <i>Arthonia protoparmeliae</i> *   | <i>Protoparmelia badia</i>                          | 6(.1)                                                                            |
| <i>Arthonia varians</i>            | <i>Lecanora bicincta</i> , <i>Lecanora rupicola</i> | 2(.3), 5(.1.2.3), 6(.2.3), 7(.3), 8(.1.3), 9(.1)                                 |
| <i>Arthonia</i> sp. 1*             | <i>Lecanora polytropa</i>                           | 3(.1), 5(.2)                                                                     |
| <i>Arthonia</i> sp. 2*             | <i>Lecanora polytropa</i>                           | 2(.2)                                                                            |
| <i>Carbonea aggregantula</i> - Cv* | <i>Candelariella vitellina</i>                      | 5(.3), 7(.3)                                                                     |
| <i>Carbonea assimilis</i> *        | <i>Tephromela atra</i>                              | 7(.2), 8(.3)                                                                     |
| <i>Carbonea intrudens</i>          | <i>Rhizocarpon geographicum</i>                     | 1(.1), 4(.3), 5(.1)                                                              |
| <i>Carbonea supersparsa</i>        | <i>Lecanora polytropa</i>                           | 2(.1), 4(.2), 7(.3), 9(.1), 9(.3)                                                |
| <i>Carbonea vitellinaria</i>       | <i>Candelariella vitellina</i>                      | 5(.3), 6(.2)                                                                     |
| <i>Cecidonia umbonella</i>         | <i>Lecidea lapicida</i> var. <i>pantherina</i>      | 6(.2), 7(.1.3), 8(.1.3), 9(.2)                                                   |
| <i>Cercidospora epipolytropa</i>   | <i>Lecanora polytropa</i>                           | 1(.1.2), 3(.3), 4(.1.2.3), 5(.2), 6(.1.2.3), 7(.1.3), 8(.1.2.3), 9(.2.3), 10(.2) |
| <i>Cercidospora solearispora</i> * | <i>Aspicilia simoensis</i>                          | 5(.2)                                                                            |
| <i>Deuteromyces</i> sp.*           | <i>Rhizocarpon geographicum</i>                     | 1(.2)                                                                            |
| <i>Endococcus macrosporus</i>      | <i>Rhizocarpon geographicum</i>                     | 4(.1.3), 5(.1.3), 6(.1.2.3), 7(.1.2.3), 8(.1.2.3), 9(.2.3), 10(.1.2.3)           |
| <i>Endococcus perpusillus</i> *    | <i>Schaereria fuscocinerea</i>                      | 2(.1.3), 9(.2)                                                                   |
| <i>Endococcus propinquus</i> - Ac  | <i>Aspicilia caesiocinerea</i>                      | 2(.3), 3(.1), 4(.2), 5(.1)                                                       |
| <i>Endococcus propinquus</i> - Rg  | <i>Rhizocarpon geographicum</i>                     | 4(.2)                                                                            |
| <i>Endococcus verrucosus</i>       | <i>Aspicilia simoensis</i>                          | 2(.1), 5(.1.2.3), 6(.1.3), 9(.1.3)                                               |
| <i>Gyrophthorus</i> sp.*           | <i>Umbilicaria cylindrica</i>                       | 2(.2), 8(.3)                                                                     |
| <i>Lichenocodium lecanorae</i>     | <i>Lecanora polytropa</i>                           | 2(.2), 3(.3), 4(.2.3), 5(.2), 6(.2), 7(.2.3), 8(.1.2.3), 9(.2.3)                 |
| <i>Lichenodiplis lecanorae</i> *   | <i>Tephromela atra</i>                              | 10(.2)                                                                           |

|                                    |                                                                                                  |                                                                                                                  |
|------------------------------------|--------------------------------------------------------------------------------------------------|------------------------------------------------------------------------------------------------------------------|
| <i>Muellerella atricola*</i>       | <i>Tephromela atra</i>                                                                           | 5(.3), 6(.1), 7(.3), 10(.1.2)                                                                                    |
| <i>Muellerella pygmaea</i> - Ca    | <i>Calvitimela armeniaca</i>                                                                     | 9(.1)                                                                                                            |
| <i>Muellerella pygmaea</i> - Ia    | <i>Immersaria arthrocarpa</i>                                                                    | 3(.3)                                                                                                            |
| <i>Muellerella pygmaea</i> - Li    | <i>Lecanora intricata</i>                                                                        | 1(.1.3), 2(1.2.), 5(.1.2.3), 6(.1),<br>10(.3)                                                                    |
| <i>Muellerella pygmaea</i> - Lp    | <i>Lecanora polytropa</i>                                                                        | 1(.1), 2(.1.3), 3(.1.2.3), 4(.1.2),<br>5(.1.2.3), 6(.1.2.3), 7(.1.2.3),<br>8(.1.2.3), 9(.1.2.3), 10(.1.2.3)      |
| <i>Muellerella pygmaea</i> - Pb    | <i>Protoparmelia badia</i>                                                                       | 8(.2)                                                                                                            |
| <i>Muellerella pygmaea</i> - Rg    | <i>Rhizocarpon geographicum</i>                                                                  | 2(.1.2.3), 3(.1.2.3), 4(.2.3),<br>5(.1.2.3), 6(.1.3), 7(.1.2.3),<br>8(.1.3), 9(.1.2.3), 10(.2.3)                 |
| <i>Muellerella pygmaea</i> - Sf    | <i>Schaereria fuscocinerea</i>                                                                   | 8(.1), 9(.1)                                                                                                     |
| <i>Muellerella pygmaea</i> s. str. | <i>Lecidea lapicida</i> var. <i>lapicida</i> ,<br><i>Lecidea lapicida</i> var. <i>pantherina</i> | 1(.1.2.3), 2(.2.3), 3(.1.2.3),<br>4(.1.2.3), 5(.1.2.3), 6(.1.2.3),<br>7(.1.2.3), 8(.1.3), 9(.1.2.3),<br>10(.1.2) |
| <i>Opegrapha geographicola*</i>    | <i>Rhizocarpon geographicum</i>                                                                  | 8(.1)                                                                                                            |
| <i>Phacographa protoparmeliae*</i> | <i>Protoparmelia badia</i>                                                                       | 3(.2), 7(.1), 8(.3)                                                                                              |
| <i>Phoma</i> sp.*                  | <i>Protoparmelia badia</i>                                                                       | 6(.3), 9(.1), 10(.1)                                                                                             |
| <i>Polycoccum microsticticum</i>   | <i>Acarospora fuscata</i>                                                                        | 2(.2), 5(.2)                                                                                                     |
| <i>Polycoccum sporastatae</i>      | <i>Sporastatia polyspora</i>                                                                     | 9(.2.3)                                                                                                          |
| <i>Rosellinula haplospora*</i>     | <i>Aspicilia simoensis</i>                                                                       | 10(.3)                                                                                                           |
| <i>Sagediopsis fissurisedens</i>   | <i>Aspilidea myrinii</i>                                                                         | 4(.1.3), 6(.3), 7(.2), 8(.2.3),<br>9(.1.2.3), 10(.3)                                                             |
| <i>Sclerococcum sphaerale</i>      | <i>Pertusaria corallina</i>                                                                      | 1(.3), 4(.3), 6(.2)                                                                                              |
| <i>Skyttea tephromelarum</i>       | <i>Tephromela atra</i>                                                                           | 1(.2), 5(.2), 8(.1)                                                                                              |
| <i>Sphaerellothecium atryneae</i>  | <i>Lecanora bicincta</i> , <i>Lecanora swartzii</i>                                              | 3(.1), 6(.1), 8(.1), 10(.1.2.3)                                                                                  |
| <i>Sphaerellothecium contextum</i> | <i>Protoparmelia badia</i>                                                                       | 7(.3), 9(.3)                                                                                                     |
| <i>Sphinctrina</i> sp.*            | <i>Lecidea lapicida</i> var. <i>pantherina</i> ,<br><i>Rhizocarpon geographicum</i>              | 6(.2), 7(.3)                                                                                                     |
| <i>Stigmatidium eucline</i>        | <i>Varicellaria lactea</i>                                                                       | 1(.2), 3(.2), 8(.1), 9(.2)                                                                                       |

|                                  |                               |                                                                                     |
|----------------------------------|-------------------------------|-------------------------------------------------------------------------------------|
| <i>Stigmidium gyrophorarum</i>   | <i>Umbilicaria cylindrica</i> | 2(.2), 7(.3), 10(.1.2.3)                                                            |
| <i>Taeniolella atricerebrina</i> | <i>Tephromela atra</i>        | 1(.1.2.3), 2(.2.3), 3(.1.2.3),<br>4(.1.3), 6(.1.2.3), 8(.2), 9(.2.3),<br>10(.1.2.3) |
| <i>Taeniolella</i> sp.*          | <i>Lecanora bicincta</i>      | 1(.2), 9(.3), 10(.1)                                                                |

## Supplementary Material R scrip

###SCRIPT De Carolis et al. 2023 "Lichen and lichenicolous fungal communities tested as suitable systems for the application of cross-taxon analysis"

```
library(vegan)
library(ggplot2)
library(cowplot)
library(multcompView)
library(viridis)
library(tidyverse)
library(hrbrthemes)
library(multcompView)
library(ggplot2)
library(latticeExtra)
library(Rarefy)
require(ade4)
require(adv)
require(ape)
require(phyloregion)
require(raster)
library(entropart)
library(corrplot)
library(car)
```

###Variable Description

### 1) "lich" is the composition matrix of lichens. It include the first column with the PLOT ID and the second one with the SUBPLOT ID; 2) "lifu" is the composition matrix of fungi. It include the first column with the PLOT ID and the second one with the SUBPLOT ID

```
subplot<-as.factor(lich[,2])###transform the subplot ID in a factor
plot<-as.factor(lich[,1])###transform the plot ID in a factor
sp_lich<-lich[,4:ncol(lich)]#save as a new dataframe the "lich" matrix excluding the ID columns
sp_lifu<-lifu[,4:ncol(lifu)]#save as a new dataframe the "lifu" matrix excluding the ID columns
```

###estimation of species richness, shannon's index, eveness (Pielou index)

```
lich_rich<- specnumber(sp_lich)#n° of species in each sampling unit
lich_shan<- diversity(sp_lich)#shannon index for each sampling unit
lich_evene<- lich_shan/log(sp_lich)#Pielou index for each sampling unit
lifu_rich<- specnumber(sp_lifu)#n° of species in each sampling unit
lifu_shan<- diversity(sp_lifu)#shannon index for each sampling unit
lifu_evene<- lifu_shan/log(sp_lifu)#Pielou index for each sampling unit
```

```
lich_rich_data <- as.data.frame(lich_rich)
lifu_rich_data <- as.data.frame(lifu_rich)
lich_shan_data <- as.data.frame(lich_shan)
```

```

lifu_shan_data <- as.data.frame(lifu_shan)
lich_evene_data <- as.data.frame(lich_evene)
lifu_evene_data <- as.data.frame(lifu_evene)

###Analyses Of Variance of diversity indexes
# Analyses Of Variance lichens
nalis_varia_rich<- aov(lich_rich_data$lich_rich~as.factor(lich$Plot.1))
nalis_varia_shann<- aov(lich_shan_data$lich_shan~as.factor(lich$Plot.1))
nalis_varia_even <- aov(lich_evene_data$lich_evene~as.factor(lich$Plot.1))
# Analyses Of Variance lichenicolous fungi
nalis_varia_rich_lifu <- aov(lifu_rich_data$lifu_rich~as.factor(lifu$Plot.1))
nalis_varia_shann_lifu <- aov(lifu_shan_data$lifu_shan~as.factor(lifu$Plot.1))
nalis_varia_even_lifu <- aov(lifu_evene_data$lifu_evene~as.factor(lifu$Plot.1))

###boxplot graph rich
# create data
names <- c( rep(1:10, each = 3))
value_rich_lich <- lich_rich_data$lich_rich
value_rich_lifu <- lifu_rich_data$lifu_rich
value_shan_lich <- lich_shan_data$lich_shan
value_shan_lifu <- lifu_shan_data$lifu_shan
value_even_lich <- lich_evene_data$lich_evene
value_even_lifu <- lifu_evene_data$lifu_evene

# boxplot richness
ggplot(lich_rich_data, aes(x=as.factor(names), y=value_rich_lich))+
  geom_boxplot(fill="slateblue", alpha=0.2) +
  xlab("plot")#plot lich_rich
ggplot(lifu_rich_data, aes(x=as.factor(names), y=value_rich_lifu)) +
  geom_boxplot(fill="red", alpha=0.2) +
  xlab("plot")#plot lifu_rich

#boxplot shannon_lich
ggplot(lich_shan_data, aes(x=as.factor(names), y=value_shan_lich)) +
  geom_boxplot(fill= "slateblue", alpha = 0.2)+
  xlab("plot")
#plot shannon_lifu
ggplot(lifu_shan_data, aes(x=as.factor(names), y=value_shan_lifu)) +
  geom_boxplot(fill= "red", alpha = 0.2)+
  xlab("plot")

#boxplot eveness
ggplot(lich_evene_data, aes(x=as.factor(names_even), y=value_even_lich)) +
  geom_boxplot(fill= "slateblue", alpha = 0.2)+
  xlab("plot")
ggplot(lifu_evene_data, aes(x=as.factor(names_even), y=value_even_lifu)) +
  geom_boxplot(fill= "red", alpha = 0.2)+
  xlab("plot")

###accumulation curves
lich_accrues<- specaccum(lich_acc[-1], method = "exact", w = NULL)
plot(lich_accrues)
lifu_accrues<- specaccum(Lifu_acc[-1], method = "exact", w = NULL)
plot(lich_accrues)
lines(lifu_accurve, col="red")
str(lich_accurve)
x <- c(1:30)

```

```
plot(x, lich_accurve$richness/lifu_accurve$richness )
plot(x, lifu_accurve$richness/lich_accurve$richness )
```

```
###spatial Rarefaction curves
Lichens <- as.data.frame(lich)
Coord <- as.data.frame(coordinate_sampling)
```

```
#LICHENS
dist_sp <- dist(Coord, method = "euclidean")
Lich_rarefaction <- directionalSAC(lich[,4:50],dist_sp)
plot(1:30,Lich_rarefaction$N_Exact, xlab ="plot", ylab="species",pch=1)
points(1:30,Lich_rarefaction$N_SCR, pch=2)
```

```
#Lifu
dist_sp <- dist(Coord, method = "euclidean")
Lifu_rarefaction <- directionalSAC(lifu[,4:44],dist_sp)
plot(1:30,Lifu_rarefaction$N_Exact, xlab ="plot", ylab="species",pch=1)
points(1:30,Lifu_rarefaction$N_SCR,pch=2)
```

```
###Diversity Partitioning Analysis
#lifu
indici_spaziale<-data.frame(seq(1:30),rep(1:10, each=3),rep(1,30))
lifu_part<-adipart(t(Lifu_DIVPART),indici_spaziale, index="richness", nsimul=9999)
plot(lifu_part)
#lich
indici_spaziale<-data.frame(seq(1:30),rep(1:10, each=3),rep(1,30))
lich_part<-adipart(t(Lich_DIVPART),indici_spaziale, index="richness", nsimul=9999)
plot(lich_part)
```

```
#####Correlation between indeces
indexdiversit <- data.frame(lich_rich, lich_shan, lich_evane, lifu_rich, lifu_shan, lifu_evane)
matrixcorr <- cor(indexdiversit)
test <- cor.mtest(indexdiversit)
corrplot(matrixcorr, p.mat = test$p, method = "color", diag = FALSE, type = "upper",
          sig.level = c(.001, .01, .05), pch.cex = .9,
          insig = "label_sig", pch.col = "white")
#####
#####
```

```
#MANTEL TEST correspondence in species richness
```

```
vettore_richness_lich <- lich_rich_data$lich_rich
vettore_richness_lifu <- lifu_rich_data$lifu_rich
vettore_richness_lich_pa <- lich_rich_data$lich_rich
vettore_richness_lifu_pa <- lifu_rich_data$lifu_rich
```

```
distance_richness_lich <- vegdist(vettore_richness_lich, method = "euclidean")
distance_richness_lifu <- vegdist(vettore_richness_lifu, method = "euclidean")
distance_richness_lich_pa <- vegdist(vettore_richness_lich_pa, method = "euclidean")
distance_richness_lifu_pa <- vegdist(vettore_richness_lifu_pa, method = "euclidean")
```

```
mtest <- mantel(distance_richness_lich, distance_richness_lifu, method = "pearson", 9999)
mtest_pa <- mantel(distance_richness_lich_pa, distance_richness_lifu_pa, method = "pearson", 9999)
```

```
#####MANTEL TEST IN COMPOSITON####
```

```

matr_composition_lich <- lich_shan_data
matr_composition_lifu <- lifu_shan_data
matr_composition_lich_PA <- lich_PA_compos[,2:50]
matr_composition_lifu_PA <- lifu_PA_composition[,2:41]

distance_compo_lich <- vegdist(matr_composition_lich, method = "bray")
distance_compo_lifu <- vegdist(matr_composition_lifu, method = "bray")
distance_compo_lich_pa <- vegdist(matr_composition_lich_PA, method = "jaccard")
distance_compo_lifu_pa <- vegdist(matr_composition_lifu_PA, method = "jaccard")

mtestcompositionPA <- mantel(distance_compo_lich,distance_compo_lifu, method = "pearson", 9999)

####CO-correspondence analyses
subplot<-as.factor(lich[,2])
plot<-as.factor(lich[,1])
sp_lich<-lich[,4:ncol(lich)]
sp_lifu<-lifu[,4:ncol(lifu)]

diss_lich<-vegdist(sqrt(lich[,4:ncol(lich)]), method="bray")
diss_lifu<-vegdist(sqrt(lifu[,4:ncol(lifu)]), method="bray")
plot(diss_lich,diss_lifu)

#Dissimilarity matrices
pers_manteljac<-mantel(diss_lich, diss_lifu, method="pearson", permutations=4999)
sper_manteljac<-mantel(diss_lich, diss_lifu, method="spearman", permutations=4999)
scatterplot(1-diss_lifu~1-diss_lich, reg.line=lm, smooth=FALSE, spread=FALSE, id.method='mahal', id.n = 2,
boxplots=FALSE, span=0.5, xlab="Lichens Similarity", ylab="Lifu Similarity")

# to normalize the data we use the square root method
sqrtlich<-sqrt(sp_lich)
sqrtlifu<-sqrt(sp_lifu)

###co-correspondence, all the below analyses are used to co-correspondence analyses with presence/absence
data

library(cocorresp)
coca_bis<-coca(sp_lifu~,data=sp_lich)
coca_pa<-coca(sqrtlifu~,data=sqrtlich)

summary(coca_pa)
summary(coca_bis)

plot(coca_pa)
plot(coca_pa, which = "response", main = "Lifu")
plot(coca_pa, which = "predictor", main = "Lichens")

summary(coca_bis)
plot(coca_bis)
plot(coca_bis, which = "response", main = "Lifu")
plot(coca_bis, which = "predictor", main = "Lichens")

### Cross validation analyses of axes
x_pa<-crossval(sqrtlifu,sqrtlich, n.axes=4)
permtest_pa<-permutest(coca_pa,permutations = 4999)
summary(permtest_pa)

x_bis<-crossval(sp_lifu,sp_lich, n.axes=4)

```

```

permtest_bis<-permutest(coca_bis,permutations = 4999)
summary(permtest_bis)

#####PLOT SQRT#####
scorespecieslich<-data.frame(coca_pa$scores$species$X)
scorespecieslifu<-data.frame(coca_pa$scores$species$Y)
scoresitelich<-data.frame(coca_pa$scores$site$X)

par(mfrow=c(1,2))
plot(scorespecieslich$Comp.1,scorespecieslich$Comp.2,xlim=c(-10,+10),ylim=c(-15,+15),cex.axis=1,cex.lab=1,
xlab="Axis 1",ylab="Axis 2",main="Lichens",cex.main=1, pch=".")
text(scorespecieslich$Comp.1,scorespecieslich$Comp.2,labels=row.names(scorespecieslich),cex=0.6,col="black")
points(scoresitelich$Comp.1,scoresitelich$Comp.2,cex=0.5,col="blue")
text(scoresitelich$Comp.1,scoresitelich$Comp.2, labels=row.names(scoresitelich),cex=0.6,col="blue")
plot(scorespecieslifu$Comp.1,scorespecieslifu$Comp.2,xlim=c(-1.5,+1.5),ylim=c(-1.5,+2),cex.axis=1,cex.lab=1,
xlab="Axis 1",ylab="Axis 2",main="Lifu",cex.main=1, pch=".")
text(scorespecieslifu$Comp.1,scorespecieslifu$Comp.2,labels=row.names(scorespecieslifu),cex=0.6,col="black")
points(scoresitelich$Comp.1,scoresitelich$Comp.2,cex=0.5,col="blue")
text(scoresitelich$Comp.1,scoresitelich$Comp.2, labels=row.names(scoresitelich),cex=0.6,col="blue")

###TEST BETA DISPERSION
fattore<-as.numeric(fattore)
fattore1<-factor(rep(c(1,2),c(63,41)))
summary(fattore1)
dist_speci<-vegdist(t(tutte_specie), method = "bray")

beta_habitat<-betadispersion2(dist_speci, fattore1, 999)
dim(matrix(dist_speci))

###Differences in beta diversity tested using the betadispersion2 function, also available in Bacaro et al. 2012,
2013

betadispersion2<-function(data, factor, permutation)
{
  require(vegan)
  x<-as.dist(data)
  x.estend <- as.vector(x)
  if (missing(permutation) )
    permutation<- 9999
  N <- attributes(x)$Size
  grouping <- as.factor(factor)
  matched <- function(irow, icol, grouping) {
    grouping[irow] == grouping[icol]
  }
  irow <- as.vector(as.dist(row(matrix(nrow = N, ncol = N))))
  icol <- as.vector(as.dist(col(matrix(nrow = N, ncol = N))))
  within <- matched(irow, icol, grouping)
  cl.vec <- rep("Between", length(x))
  take <- as.numeric(irow[within])
  cl.vec[within] <- levels(grouping)[grouping[take]]
  cl.vec <- factor(cl.vec, levels = c("Between", levels(grouping)))
  frame<-data.frame(x.estend, cl.vec)
  reduced<-frame[!cl.vec=="Between",]
  oneway <- lm(x.estend ~ cl.vec, data=reduced)
  promo<-anova(oneway,test="F")
  F.mod<-promo[1,4]
  Average_Beta_Within<-tapply(reduced$x.estend, list(cl.vec=reduced$cl.vec), mean, na.rm=TRUE)
  permF <-array(dim=c(permutation,1))

```

```

for (i in 1:permutation)
{
  permutated<-sample(reduced$x.estend)
  model<- lm(permutated ~ reduced$cl.vec)
  vin<-anova(model,test="F")
  permF[i,1]<-vin[1,4]
}
tab <- data.frame(Df = promo[,1], SumsOfSqs = promo[,2],
  MeanSqs = promo[,3], F.Model = promo[,4],
  P = c((rowSums(t(permF) >= F.mod) + 1)/(permutation + 1), NA))
rownames(tab) <- c("Factor", "Residuals")
colnames(tab)[ncol(tab)] <- "Pr(>F)"
class(tab) <- c("anova", class(tab))
Average_Beta_Within<-data.frame(Average_Beta_Within)
col1<-row.names(Average_Beta_Within)
col2<-Average_Beta_Within[,1]
Summary_beta<-data.frame(col1,col2)
Summary<-data.frame(Summary_beta[2:nrow(Summary_beta),])
colnames(Summary)<-c("Group", "Average Beta")
output<-list(tab,Summary)
output
}

```
